# Supplementary material for: Arbuscular Mycorrhizal Fungi Enhance Biomass Growth, Mineral Content, and Antioxidant Activity in Tomato Plants under Drought Stress
Source: Hindawi journal article supplement (doi:10.1155/2023/2581608), 2023-03-07
Supplement: f1 [file 2581608.f1.docx]

**Supplementary Table. ANOVA-two way**

ANOVA on AMF enhances biomass growth, photosynthetic pigments, antioxidant activity, and mineral content in tomatoes grown in soil under drought stress. (**Unnayan, LT896 and Minto super** tomato varieties, 5 treatments with 5 replications and control one)

| No of leaves | | | | | Length of leaves (cm) | | | | Leaf width (cm) | | | | No of Branch | | | | Root length (cm) | | | |
| --- | --- | --- | --- | --- | --- | --- | --- | --- | --- | --- | --- | --- | --- | --- | --- | --- | --- | --- | --- | --- |
|  | Degrees of freedom  (DF) | Sum of squares (SS) | Mean sum of square (MSS) | P value | DF | SS | MSS | P value | DF | SS | MSS | P value | DF | SS | MSS | P value | DF | SS | MSS | P value |
| Variety | 2 | 24 | 12.241 | 0.352 | 2 | 31 | 15 | 0.187 | 2 | 215 | 107 | 0.001** | 2 | 46.25 | 23.1 | 0.000*** | 2 | 2032 | 1016 | 0.00*** |
| Treatment | 5 | 26 | 5.219 | 0.805 | 5 | 50 | 10 | 0.359 | 5 | 114 | 23 | 0.152 | 5 | 8.81 | 1.7 | 0.566 | 5 | 597 | 119 | 0.006* |
| Variety : Treatment | 10 | 68 | 6.841 | 0.803 | 10 | 97 | 10 | 0.380 | 10 | 131 | 13 | 0.468 | 10 | 15.29 | 1.5 | 0.733 | 10 | 733 | 73 | 0.025* |
| Error | 36 | 410 | 11.389 | 0.352 | 36 | 315 | 9 |  | 36 | 474 | 13 |  | 36 | 80.66 | 2.2 |  | 36 | 1090 | 30 |  |
| Total | 53 | 528 |  |  | 53 | 493 |  |  | 53 | 933 |  |  | 53 | 151.03 |  |  | 53 | 4452 |  |  |

*** indicate a significant difference at a *p≤0.001* level of significance, ** indicate a significant difference at a *p≤0.01* level of significance, * indicate a significant difference at a *p≤0.05* level of significance

**Continued**

|  | Shoot length (cm) | | | | Dry weight of root (g) | | | | Dry weight of shoot (g) | | | | Fresh weight of root (g) | | | | Fresh weight of shoot (g) | | | | Tomato yield kgplant-1 | | | |
| --- | --- | --- | --- | --- | --- | --- | --- | --- | --- | --- | --- | --- | --- | --- | --- | --- | --- | --- | --- | --- | --- | --- | --- | --- |
|  | DF | SS | MSS | P value | DF | SS | MSS | P value | DF | SS | MSS | P value | DF | SS | MSS | P value | DF | SS | MSS | P value | DF | SS | MSS | P value |
| Variety | 2 | 1921 | 960 | 7.31e-10 *** | 2 | 16 | 8 | 0.00  *** | 2 | 2840 | 1420 | 0.00  *** | 2 | 11 | 6 | 0.00  *** | 2 | 6639 | 3320 | 0.00  *** | 2 | 0.8 | 0.4 | 0.00  *** |
| Treatment | 5 | 25 | 5 | 0.956 | 5 | 6 | 1.09 | 0.00  *** | 5 | 1769 | 354 | 0.00  *** | 5 | 10 | 2 | 0.002  ** | 5 | 5203 | 1041 | 0.00  *** | 5 | 1 | 0.2 | 0.001** |
| Variety : Treatment | 10 | 279 | 28 | 0.350 | 10 | 2 | 0.20 | 0.346 | 10 | 2995 | 399 | 0.00  *** | 10 | 3 | 0.27 | 0.761 | 10 | 4643 | 464 | 0.00  *** | 10 | 0.3 | 0.036 | 0.447 |
| Error | 36 | 866 | 24 |  | 36 | 6 | 0.17 |  | 36 | 113 | 3 |  | 36 | 15 | 0.42 |  | 36 | 299 | 8 |  | 36 | 1.3 | 0.03 |  |
| Total | 53 |  |  |  | 53 | 30 |  |  | 53 | 7718 |  |  | 53 | 39 |  |  | 53 | 16784 |  |  | 53 | 3.4 |  |  |

*** indicate a significant difference at a *p≤0.001* level of significance, ** indicate a significant difference at a *p≤0.01* level of significance

**Continued**

| Chlorophyll a mgg-1FW | | | | | Chlorophyll b mgg-1FW | | | | Total chlorophyll mgg-1FW | | | | Carotenoid mgg-1FW | | | |
| --- | --- | --- | --- | --- | --- | --- | --- | --- | --- | --- | --- | --- | --- | --- | --- | --- |
|  | Degrees of freedom  (DF) | Sum of squares (SS) | Mean sum of square (MSS) | P value | DF | SS | MSS | P value | DF | SS | MSS | P value | DF | SS | MSS | P value |
| Variety | 2 | 0.000005 | 0.000003 | 0.41 | 2 | 0.000005 | 0.000002 | 0.042 | 2 | 0.00002 | 0.000011 | 0.093 | 2 | 1.68 | 0.84 | 0.16 |
| Treatment | 5 | 0.000012 | 0.000002 | 0.53 | 5 | 0.000003 | 0.000001 | 0.585 | 5 | 0.00002 | 0.000005 | 0.381 | 5 | 2.46 | 0.49 | 0.36 |
| Variety : Treatment | 10 | 0.000044 | 0.000004 | 0.17 | 10 | 0.000005 | 0.000001 | 0.663 | 10 | 0.00008 | 0.000008 | 0.092 | 10 | 6.87 | 0.69 | 0.15 |
| Error | 36 | 0.000103 | 0.000003 |  | 36 | 0.000026 | 0.000001 |  | 36 | 0.00015 | 0.000004 |  | 36 | 15.66 | 0.44 |  |
| Total | 53 | 0.000164 |  |  | 53 | 0.000039 |  |  | 53 | 0.00028 |  |  | 53 | 26.68 |  |  |

**Continued**

| Catalase mM min-1mg-1 P | | | | | Hydrogen peroxide (H2O2) µmg-1FW | | | | Malondialdehyde (MDA) µmmin-1g-1FW | | | | Ascorbate peroxidase (APX) mM min-1mg-1 P | | | |
| --- | --- | --- | --- | --- | --- | --- | --- | --- | --- | --- | --- | --- | --- | --- | --- | --- |
|  | Degrees of freedom  (DF) | Sum of squares (SS) | Mean sum of square (MSS) | P value | DF | SS | MSS | P value | DF | SS | MSS | P value | DF | SS | MSS | P value |
| Variety | 2 | 0.00012 | 0.000061 | 0.000 *** | 2 | 13286 | 6643 | 0.045 | 2 | 0.005 | 7.81 | 0.002* | 2 | 0.016 | 0.0078 | 0.001** |
| Treatment | 5 | 0.000073 | 0.000015 | 0.011* | 5 | 39855 | 7971 | 0.005 | 5 | 0.004 | 2.53 | 0.046* | 5 | 0.008 | 0.0015 | 0.181 |
| Variety : Treatment | 10 | 0.00014 | 0.000014 | 0.004* | 10 | 72824 | 7282 | 0.002* | 10 | 0.008 | 2.49 | 0.022* | 10 | 0.033 | 0.0033 | 0.003* |
| Error | 36 | 0.00015 | 0.000004 |  | 36 | 70728 | 1965 |  | 36 | 0.012 |  |  | 36 | 0.034 | 0.0009 |  |
| Total | 53 | 0.00044 |  |  | 53 | 196693 |  |  | 53 | 0.029 |  |  | 53 | 0.090 |  |  |

*** indicate a significant difference at a *p≤0.001* level of significance, ** indicate a significant difference at a *p≤0.01* level of significance, * indicate a significant difference at a *p≤0.05* level of significance

**Continued**

| Sodium (Na) mg kg-1 | | | | | Potassium (K) mg kg-1 | | | | Calcium (Ca) mg kg-1 | | | | Magnesium (Mg) mg kg-1 | | | | Iron (Fe) mg kg-1 | | | |
| --- | --- | --- | --- | --- | --- | --- | --- | --- | --- | --- | --- | --- | --- | --- | --- | --- | --- | --- | --- | --- |
|  | DF | SS | MSS | P value | DF | SS | MSS | P value | DF | SS | MSS | P value | DF | SS | MSS | P value | DF | SS | MSS | P value |
| Variety | 2 | 4181 | 2090 | 0.00 *** | 2 | 189903 | 94952 | 0.00  *** | 2 | 4030 | 2015 | 0.00  *** | 2 | 57319 | 28660 | 0.00  *** | 2 | 7123 | 3561 | 0.00  *** |
| Treatment | 5 | 1122 | 224 | 0.00  *** | 5 | 492688 | 98538 | 0.00  *** | 5 | 1315 | 263 | 0.00  *** | 5 | 94068 | 18814 | 0.00  *** | 5 | 10953 | 2191 | 0.00  *** |
| Variety : Treatment | 10 | 6535 | 654 | 0.00  *** | 10 | 515076 | 51508 | 0.00  *** | 10 | 4030 | 403 | 0.00  *** | 10 | 69635 | 6964 | 0.00  *** | 10 | 30773 | 3077 | 0.00  *** |
| Error | 36 | 59 | 2 |  | 36 | 235683 | 6547 |  | 36 | 188 | 5 |  | 36 | 1617 | 445 |  | 36 | 116 | 3 |  |
| Total | 53 | 11896 |  |  | 53 | 1433351 |  |  | 53 | 9563 |  |  | 53 | 222638 |  |  | 53 |  |  |  |

*** indicate a significant difference at a *p≤0.001* level of significance
